# Supplementary material for: Hepatocyte-targeted delivery using oleanolic acid-loaded liposomes for enhanced hepatocellular carcinoma therapy
Source: Royal Society of Chemistry journal article supplement (doi:10.1039/d3bm00261f), 2023-01-01
Supplement: d3bm00261f1.pdf [file d3bm00261f1.pdf]

## Supplementary Information

### **TITLE:**

Hepatocyte-targeted delivery using oleanolic acid-loaded liposomes for enhanced hepatocellular carcinoma therapy

### **Author:**

Xinbo Wei<sup>a#</sup>, Depeng Yang<sup>b#</sup>, Zheng Xing<sup>a,c</sup>, Jialing Cai<sup>b</sup>, Li Wang<sup>a</sup>, Chen Zhao<sup>d</sup>, Xinran Wei<sup>a</sup>, Meiyi Jiang<sup>b</sup>, Handi Sun<sup>b</sup>, Lu Zhou<sup>b</sup>, Yubo Fan<sup>a</sup>, Huan Nie<sup>b\*\*</sup>, Haifeng Liu<sup>a\*</sup>

<sup>a</sup>. Key Laboratory for Biomechanics and Mechanobiology (Beihang University) of Ministry of Education, Beijing Advanced Innovation Center for Biomedical Engineering, School of Biological Science and Medical Engineering, Beihang University, Beijing, 100083, P. R. China.

<sup>b</sup>. School of Life Sciences and Technology, Harbin Institute of Technology, Harbin, Heilongjiang, 150001, P. R. China.

<sup>c</sup>. School of Pharmacy, Changzhou University, Changzhou, 213164, P. R. China.

<sup>d</sup>. School of Pharmaceutical Sciences, Tsinghua University, Beijing, 100084, P. R. China.

\* Corresponding author. haifengliu@buaa.edu.cn (H. Liu)

\*\* Corresponding author. nh1212@hit.edu.cn (H. Nie)

# The two authors contributed equally to this paper.

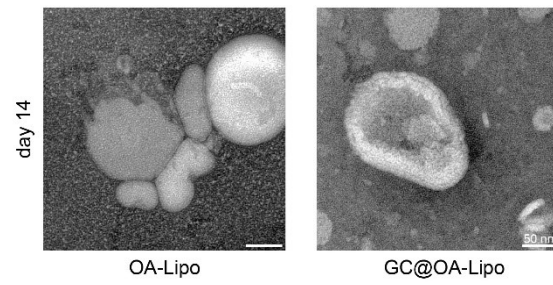

**Figure S1.** SEM images of liposomes after 14 days of storage at room temperature. GC@OA-Lipo could retain relatively spherical shape, whereas OA-Lipo exhibited aggregation and membrane rupture.

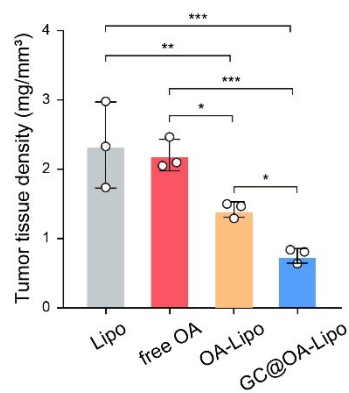

**Figure S2.** Quantification of tumor tissue density after 12 days of treatment.
